# Supplementary material for: The Exotic Materia Medica of Chinese Medicine: A Survey of Its Resources and Medical Information in 1029 BC–1999 AD
Source: Research Square preprint supplement (doi:10.21203/rs.3.rs-900422/v1), 2021-10-12
Supplement: Supplementary file 1 [file 339272fb1952a11a5bd276e7.xlsx]

## Sheet: Sheet1
Medicinal Parts	Commonly Used TCM	Commonly Used ECM	Percentage of Commonly Used ECM/Commonly Used TCM	Detailed List
Roots and Rhizomes	106	10	0.094	radix phytolaccae，American ginseng，rhizoma picrorhizae，radix aucklandiae，rhizoma cyperi，rhizoma zingiberis，rhizoma curcuma，rhizoma curcumae longae，radix curcumae，marihuana
Stems	8	3	0.375	Duramen sappan，lignum dalbergiae，Resinatum Lignum Aquilariae
Bark	11	1	0.091	cinnamon
Leaves	10	1	0.1	folium sennae
Flowers	12	4	0.333	clove，flos daturae，safflower，stigma croci
Fruits and seeds	46	13	0.283	nutmeg、semen cassiae、boat-fruited scaphium seed、medicine terminalia fruit，fennel fruit、semen strychni、Semen Pharbitidis、henbane、common carpesium fruit、Areca catechu、fructus amomi、fructus amomi rotundus、galanga galangal seed
Whole plant	27	0	0	0
Algae and Lichens	8	0	0	0
Resin	6	6	1	storax，frankincense，myrrh，benzoin，dragon's blood，asafetida
Others	6	3	0.5	indigo naturalis、cutch、Aloe
Total	240	41	0.171
