# Supplementary material for: The Exotic Materia Medica of Chinese Medicine: A Survey of Its Resources and Medical Information in 1029 BC–1999 AD
Source: Research Square preprint supplement (doi:10.21203/rs.3.rs-900422/v1), 2021-10-12
Supplement: Supplementary file 2 [file 69e1d7a94282b0bb8575e0b0.xlsx]

## Sheet: Sheet1
科序号	Family	Af	Be	Bu	Co	Cou	CR	Dy	FAV	FH	FI	Fo	FS	GM	Gr	He	II	Je	Me	Na	Oi	Or	Pe	Pi	Po	Re	SC	ST	UI	Wo	Total Result
1	Acanthaceae															1			1			3									5
2	Aizoaceae								1																						1
3	Amaranthaceae								3			2								2		5							8		20
4	Amaryllidaceae																					7									7
5	Anacardiaceae								3																						3
6	Anatidae																								1						1
7	Annonaceae								1								1														2
8	Apiaceae								4										2				3						1		10
9	Apocynaceae	1																				3									4
10	Araceae																		2			2									4
11	Araliaceae					1																1									2
12	Arecaceae								1										2		1	1									5
13	Asclepiadaceae																					2									2
14	Asparagaceae						1															1									2
15	Asteraceae							1	5			1							6	7	1	10	1				1		19		52
16	Balsaminaceae																					1									1
17	Basellaceae								2																						2
18	Begoniaceae																					2									2
19	Berberidaceae												1																		1
20	Bignoniaceae																					2									2
21	Bixaceae							1																							1
22	Bovidae																		1												1
23	Brassicaceae								7													1	1						4		13
24	Bromeliaceae								1													1									2
25	Burseraceae																						4								4
26	Cactaceae															3						4									7
27	Cannabaceae						1																						1		2
28	Cannaceae																					3									3
29	Caprifoliaceae																		1			1									2
30	Caricaceae								1																						1
31	Caryophyllaceae																					1							3		4
32	Castoridae																		1												1
33	Casuarinaceae	1																													1
34	Cleomaceae																			2											2
35	Combretaceae			2															2												4
36	Commelinaceae																					2				1					3
37	Convolvulaceae														1							6							1		8
38	Coralliidae																	1													1
39	Crassulaceae																					1							1		2
40	Cucurbitaceae								6																						6
41	Cyperaceae																					2							2		4
42	Dioscoreaceae														1																1
43	Dipterocarpaceae																		1				1								2
44	Euphorbiaceae			1											1	2			2	1		7						1	8		23
45	Fabaceae	3			1		1	2	9			6		3	2				10	4	1	12						2	4	1	61
46	Fagaceae																		1												1
47	Flacourtiaceae																		1												1
48	Geraniaceae																					2									2
49	Guttiferae							1									1							1							3
50	Hamamelidaceae																						1								1
51	Hydrocharitaceae																					1									1
52	Iridaceae								1										1			4									6
53	Lamiaceae									2									1			5	3						2	1	14
54	Lauraceae																3					1									4
55	Lessoniaceae																1														1
56	Liliaceae								3										1			7									11
57	Linaceae						1																								1
58	Loganiaceae																		1												1
59	Lythraceae								3													1									4
60	Magnoliaceae								1								1					1									3
61	Malvaceae	1	1				5		2													2							6		17
62	Marantaceae																					2									2
63	Moraceae								2													1									3
64	Musaceae								3																						3
65	Myristicaceae																		1				1								2
66	Myrtaceae	6							5								1		1				1								14
67	Nyctaginaceae																					2									2
68	Oleaceae												1								1	2	1							1	6
69	Onagraceae																					4							1		5
70	Oxalidaceae								1													1							1		3
71	Papaveraceae																		1			3									4
72	Passifloraceae								2													2									4
73	Pedaliaceae																				1										1
74	Phytolaccaceae																		1												1
75	Pinaceae	1															1	1													3
76	Piperaceae																		1				3						1		5
77	Pittosporaceae												1																		1
78	Poaceae											3			3								1						3		10
79	Polygonaceae														1							1									2
80	Pontederiaceae											1																			1
81	Portulacaceae																		1			1							1		3
82	Primulaceae																												1		1
83	Ranunculaceae																					1									1
84	Rosaceae																					2									2
85	Rubiaceae		1																4										1		6
86	Rutaceae																		1				1								2
87	Santalaceae			1																											1
88	Saxifragaceae												1																		1
89	Scrophulariaceae																		1			2							5		8
90	Solanaceae								3		1				1				3	1		4							8		21
91	Styracaceae																						1								1
92	Thymelaeaceae																						1								1
93	Tropaeolaceae																					1									1
94	Urticaceae																					1							1		2
95	Verbenaceae																					3							1		4
96	Violaceae																					2									2
97	Vitaceae								1																						1
98	Zingiberaceae																		3			1	2						2		8
99	Mineral																	1	1												2
	Total Result	13	2	4	1	1	9	5	71	2	1	13	4	3	10	6	9	3	56	17	5	141	26	1	1	1	1	3	86	3	498
